# Supplementary material
Source: PubMed Central journal article supplement (PMC6145464)
Supplement: NIHMS961446-supplement-supplement_1.pdf [file NIHMS961446-supplement-supplement_1.pdf]

**Supplemental Table 1.** Baseline characteristics of study sample vs. participants excluded due to missing MCP-1 value

| Variable                                                 | Included in cohort<br>N=3,257 | Excluded from cohort<br>N=46 | <i>P</i> value |
|----------------------------------------------------------|-------------------------------|------------------------------|----------------|
| Age, years, median (IQR)                                 | 43.0 (36.0, 52.0)             | 43.0 (35.0, 49.0)            | 0.64           |
| Female sex, N (%)                                        | 1823 (56.0)                   | 24 (52.2)                    | 0.61           |
| Race, N (%)                                              |                               |                              | 0.16           |
| Black                                                    | 1698 (52.1)                   | 18 (39.1)                    |                |
| White                                                    | 936 (28.8)                    | 19 (41.3)                    |                |
| Hispanic                                                 | 555 (17.0)                    | 7 (15.2)                     |                |
| Other                                                    | 68 (2.1)                      | 2 (4.4)                      |                |
| Current smoker, N (%)                                    | 1475 (45.4)                   | 28 (60.9)                    | 0.04           |
| Hypertension, N (%)                                      | 1175 (36.1)                   | 14 (30.4)                    | 0.43           |
| Diabetes mellitus, N (%)                                 | 389 (11.9)                    | 7 (15.2)                     | 0.50           |
| Hyperlipidemia, N (%)                                    | 421 (13.0)                    | 6 (13.3)                     | 0.95           |
| Prior CV disease, N (%) <sup>a</sup>                     | 240 (7.4)                     | 2 (4.4)                      | 0.43           |
| Blood pressure, mmHg                                     |                               |                              |                |
| Systolic, median (IQR)                                   | 124.2 (114.9, 135.8)          | 112.7 (133.3, 132.1)         | 0.54           |
| Diastolic, median (IQR)                                  | 77.9 (72.7, 84.0)             | 78.1 (73.4, 84.1)            | 0.66           |
| BMI, kg/m <sup>2</sup> , median (IQR)                    | 28.5 (24.6, 33.3)             | 27.4 (24.1, 31.9)            | 0.13           |
| Total cholesterol, mg/dL, median (IQR)                   | 177.0 (154.0, 203.0)          | 175.0 (139.0, 196.0)         | 0.22           |
| HDL cholesterol, mg/dL, median (IQR)                     | 47.0 (40.0, 57.0)             | 48.0 (38.0, 57.0)            | 0.99           |
| ACR, mg/g, median (IQR)                                  | 2.9 (1.9, 5.5)                | 2.5 (1.9, 4.0)               | 0.28           |
| ACR, mg/g, mean (SD)                                     | 21.6 (190.3)                  | 40.2 (234.2)                 | 0.28           |
| Estimated GFR, mL/min/1.73 m <sup>2</sup> , median (IQR) | 98.0 (84.6, 113.2)            | 102.9 (22.4)                 | 0.39           |

ACR, urine albumin-to-creatinine ratio; BMI, body mass index; CKD, chronic kidney disease; CV, cardiovascular; DHS, Dallas Heart Study; GFR, glomerular filtration rate; HDL, high density lipoprotein; IQR, interquartile range; MCP-1, monocyte chemoattractant protein-1

<sup>a</sup>Prior cardiovascular disease was defined as self-reported history of prior myocardial infarction, revascularization, heart failure, or stroke.

**Supplemental Table 2.** Baseline ACR and eGFR of the cohort by quartile of MCP-1 and CKD subgroup

| <b>Entire Cohort, N=3,257</b>                            |                                  |                           |                           |                                       |
|----------------------------------------------------------|----------------------------------|---------------------------|---------------------------|---------------------------------------|
| Variable                                                 | Quartile of MCP-1 (range, pg/mL) |                           |                           |                                       |
|                                                          | Q1 (1.7-122.4)<br>N=813          | Q2 (122.6-167.1)<br>N=816 | Q3 (167.4-225.6)<br>N=814 | Q4 (225.7-2011.0)<br>N=814            |
| ACR, mg/g, median (IQR)                                  | 2.8 (1.8, 4.8)                   | 2.9 (1.8, 5.2)            | 3.0 (1.9, 5.8)            | 3.1 (1.8, 6.9) <sup>abe</sup>         |
| ACR, mg/g, mean (SD)                                     | 8.1 (31.1)                       | 13.8 (68.5)               | 22.0 (166.2)              | 42.4 (333.3) <sup>abe</sup>           |
| Estimated GFR, mL/min/1.73 m <sup>2</sup> , median (IQR) | 100.9 (88.3, 116.3)              | 99.0 (85.4, 113.0)        | 97.0 (83.6, 111.5)        | 94.7 (80.6, 112.1) <sup>abcdefg</sup> |
| <b>Non-CKD, N=2,971</b>                                  |                                  |                           |                           |                                       |
| Variable                                                 | Quartile of MCP-1 (range, pg/mL) |                           |                           |                                       |
|                                                          | Q1 (1.7-120.2)<br>N=743          | Q2 (120.3-164.6)<br>N=742 | Q3 (164.7-220.9)<br>N=743 | Q4 (221.0-2011.0)<br>N=743            |
| ACR, mg/g, median (IQR)                                  | 2.6 (1.8, 4.4)                   | 2.7 (1.8, 4.4)            | 2.7 (1.8, 4.7)            | 2.8 (1.7, 4.7)                        |
| ACR, mg/g, mean (SD)                                     | 3.8 (3.6)                        | 3.8 (3.5)                 | 3.9 (3.5)                 | 4.1 (3.9)                             |
| Estimated GFR, mL/min/1.73 m <sup>2</sup> , median (IQR) | 100.7 (88.4, 115.9)              | 99.2 (86.4, 113.4)        | 97.6 (85.1, 112.6)        | 95.3 (82.7, 112.1) <sup>abe</sup>     |
| <b>CKD, N=286</b>                                        |                                  |                           |                           |                                       |
| Variable                                                 | Quartile of MCP-1 (range, pg/mL) |                           |                           |                                       |
|                                                          | Q1 (48.9-142.3)<br>N=71          | Q2 (143.6-192.2)<br>N=72  | Q3 (192.6-269.8)<br>N=72  | Q4 (271.7-2004.0)<br>N=71             |
| ACR, mg/g, median (IQR)                                  | 52.0 (29.4, 132.3)               | 42.3 (26.3, 89.5)         | 40.5 (19.3, 81.2)         | 56.5 (22.2, 218.5)                    |
| ACR, mg/g, mean (SD)                                     | 133.6 (211.0)                    | 99.3 (162.8)              | 273.0 (676.0)             | 316.0 (981.8)                         |
| Estimated GFR, mL/min/1.73 m <sup>2</sup> , median (IQR) | 100.6 (82.4, 115.6)              | 91.7 (72.6, 111.3)        | 82.7 (56.1, 109.3)        | 74.6 (47.7, 106.2) <sup>a</sup>       |

ACR, urine albumin-to-creatinine ratio; GFR, glomerular filtration rate; IQR, interquartile range; MCP-1, monocyte chemoattractant protein-1

<sup>a</sup>P<0.05 for trend

<sup>b</sup>P<0.05 for fourth vs. first quartile

<sup>c</sup>P<0.05 for fourth vs. second quartile

<sup>d</sup>P<0.05 for fourth vs. third quartile

<sup>e</sup>P<0.05 for third vs. first quartile

<sup>f</sup>P<0.05 for third vs. second quartile

<sup>g</sup>P<0.05 for second vs. first quartile

**Supplemental Table 3.** *P* values for baseline ACR and eGFR of the cohort by quartile of MCP-1 and CKD subgroup

| Variable                                                    | Omnibus<br><i>P</i> value | Q4 vs<br>Q1 | Q4 vs<br>Q2 | Q4 vs<br>Q3 | Q3 vs<br>Q1 | Q3 vs<br>Q2 | Q2 vs<br>Q1 | <i>P</i> for<br>trend |
|-------------------------------------------------------------|---------------------------|-------------|-------------|-------------|-------------|-------------|-------------|-----------------------|
| <b>Entire Cohort, N=3,257</b>                               |                           |             |             |             |             |             |             |                       |
| ACR, mg/g, median (IQR)                                     | 0.02                      | 0.003       | 0.11        | 0.32        | 0.03        | 0.51        | 0.14        | 0.002                 |
| Estimated GFR, mL/min/1.73<br>m <sup>2</sup> , median (IQR) | <0.0001                   | <0.0001     | <0.0001     | 0.03        | <0.0001     | 0.03        | 0.01        | <0.0001               |
| <b>Non-CKD, N=2,971</b>                                     |                           |             |             |             |             |             |             |                       |
| ACR, mg/g, median (IQR)                                     | 0.74                      |             |             |             |             |             |             | 0.29                  |
| Estimated GFR, mL/min/1.73<br>m <sup>2</sup> , median (IQR) | <0.0001                   | 0.0001      | 0.07        | 0.55        | 0.02        | 0.69        | 0.27        | <0.0001               |
| <b>CKD, N=286</b>                                           |                           |             |             |             |             |             |             |                       |
| ACR, mg/g, median (IQR)                                     | 0.24                      |             |             |             |             |             |             | 0.58                  |
| Estimated GFR, mL/min/1.73<br>m <sup>2</sup> , median (IQR) | 0.002                     | 0.13        | 0.30        | 1.00        | 0.13        | 0.30        | 0.97        | <0.0001               |

ACR, urine albumin-to-creatinine ratio; GFR, glomerular filtration rate; IQR, interquartile range; MCP-1, monocyte chemoattractant protein-1

**Supplemental Table 4.** Spearman correlations for eGFR and ACR with MCP-1 (pg/mL), stratified by CKD status

| Variable                                  | Entire cohort, N=3,257 |                | Non-CKD, N=2,971 |                | CKD, N=286 |                |
|-------------------------------------------|------------------------|----------------|------------------|----------------|------------|----------------|
|                                           | rho                    | <i>P</i> value | rho              | <i>P</i> value | rho        | <i>P</i> value |
| ACR, mg/g                                 | 0.07                   | <0.0001        | 0.04             | 0.05           | -0.02      | 0.68           |
| Estimated GFR, mL/min/1.73 m <sup>2</sup> | -0.12                  | <0.0001        | -0.10            | <0.0001        | -0.23      | <0.0001        |

ACR, urine albumin-to-creatinine ratio; GFR, glomerular filtration rate; IQR, interquartile range; MCP-1, monocyte chemoattractant protein-1
